# Supplementary material for: The eight structures of caffeic acid: a jet-cooled laser ablated rotational study
Source: Royal Society of Chemistry journal article supplement (doi:10.1039/d2ra07124j), 2022-12-21
Supplement: d2ra07124j1.pdf [file d2ra07124j1.pdf]

Supplementary material  
for  
The eight structures of caffeic acid: pushing  
rotational spectroscopy to the limit

G. Juárez, M. Sanz-Novo, Raúl Aguado, J. L. Alonso, I. León\*, E. R. Alonso\*

## 1-Broadband CP-FTMW rotational spectrum

**Figure S1.** Broadband CP-FTMW rotational spectrums of caffeic acid from 2.75 to 6.5 and from 6.6 to 14 GHz

a)

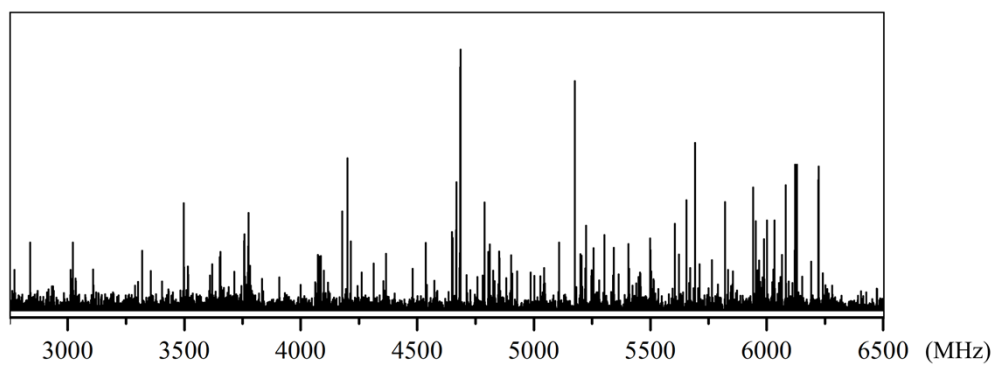

b)

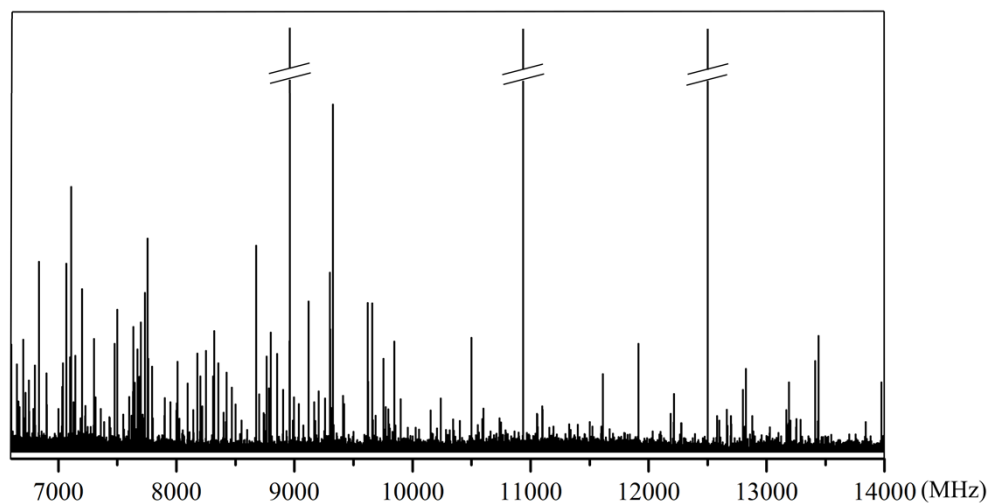

## 2-Line lists of measured transitions

**Table S1.** Measured rotational transitions and residuals (in MHz) of rotamer I.

| $J'$ | $K'_{-1}$ | $K'_{+1}$ | $J''$ | $K''_{-1}$ | $K''_{+1}$ | $\nu_{\text{obs}}$ | $\nu_{\text{obs}} - \nu_{\text{cal}}$ |
|------|-----------|-----------|-------|------------|------------|--------------------|---------------------------------------|
| 4    | 2         | 3         | 3     | 2          | 2          | 2414.907           | -0.016                                |
| 5    | 2         | 4         | 4     | 2          | 3          | 3017.883           | -0.008                                |
| 2    | 1         | 2         | 1     | 0          | 1          | 3108.121           | -0.001                                |
| 8    | 0         | 8         | 7     | 1          | 7          | 3319.684           | 0.004                                 |
| 6    | 1         | 6         | 5     | 1          | 5          | 3498.642           | 0.013                                 |
| 6    | 2         | 5         | 5     | 2          | 4          | 3620.351           | -0.001                                |
| 3    | 1         | 3         | 2     | 0          | 2          | 3652.310           | -0.018                                |
| 4    | 1         | 4         | 3     | 0          | 3          | 4177.565           | -0.014                                |
| 7    | 0         | 7         | 6     | 0          | 6          | 4193.245           | -0.021                                |
| 7    | 1         | 6         | 6     | 1          | 5          | 4358.270           | -0.010                                |
| 8    | 1         | 8         | 7     | 1          | 7          | 4659.631           | -0.022                                |
| 5    | 1         | 5         | 4     | 0          | 4          | 4685.122           | 0.005                                 |
| 8    | 0         | 8         | 7     | 0          | 7          | 4780.744           | 0.001                                 |
| 13   | 2         | 11        | 13    | 1          | 12         | 4928.498           | -0.027                                |
| 11   | 2         | 9         | 11    | 1          | 10         | 5028.626           | -0.019                                |
| 10   | 2         | 8         | 10    | 1          | 9          | 5108.413           | -0.011                                |
| 6    | 1         | 6         | 5     | 0          | 5          | 5176.645           | -0.004                                |
| 9    | 2         | 7         | 9     | 1          | 8          | 5201.407           | -0.010                                |
| 8    | 2         | 6         | 8     | 1          | 7          | 5302.479           | -0.026                                |
| 9    | 0         | 9         | 8     | 0          | 8          | 5364.045           | -0.033                                |
| 7    | 2         | 5         | 7     | 1          | 6          | 5406.638           | -0.009                                |
| 9    | 2         | 8         | 8     | 2          | 7          | 5423.661           | -0.023                                |
| 6    | 2         | 4         | 6     | 1          | 5          | 5509.051           | 0.000                                 |
| 9    | 1         | 8         | 8     | 1          | 7          | 5595.278           | -0.021                                |
| 5    | 2         | 3         | 5     | 1          | 4          | 5605.322           | -0.003                                |
| 7    | 1         | 7         | 6     | 0          | 6          | 5654.329           | 0.000                                 |
| 4    | 2         | 2         | 4     | 1          | 3          | 5691.579           | -0.015                                |
| 3    | 2         | 1         | 3     | 1          | 2          | 5764.579           | 0.001                                 |
| 2    | 2         | 0         | 2     | 1          | 1          | 5821.615           | -0.017                                |
| 2    | 2         | 1         | 2     | 1          | 2          | 5940.752           | -0.020                                |
| 3    | 2         | 2         | 3     | 1          | 3          | 6001.010           | -0.015                                |
| 10   | 2         | 9         | 9     | 2          | 8          | 6023.113           | -0.002                                |
| 4    | 2         | 3         | 4     | 1          | 4          | 6081.564           | -0.021                                |
| 8    | 1         | 8         | 7     | 0          | 7          | 6120.717           | 0.001                                 |
| 10   | 1         | 10        | 9     | 0          | 9          | 7031.401           | 0.034                                 |
| 2    | 2         | 1         | 1     | 1          | 0          | 7068.638           | 0.002                                 |
| 2    | 2         | 0         | 1     | 1          | 1          | 7109.173           | 0.011                                 |
| 3    | 2         | 2         | 2     | 1          | 1          | 7632.583           | 0.013                                 |
| 3    | 2         | 1         | 2     | 1          | 2          | 7755.377           | 0.011                                 |
| 4    | 2         | 3         | 3     | 1          | 2          | 8176.473           | 0.020                                 |
| 4    | 2         | 2         | 3     | 1          | 3          | 8425.095           | 0.015                                 |
| 5    | 2         | 4         | 4     | 1          | 3          | 8700.359           | 0.008                                 |
| 5    | 2         | 3         | 4     | 1          | 4          | 9120.772           | 0.015                                 |
| 6    | 2         | 5         | 5     | 1          | 4          | 9204.413           | 0.019                                 |
| 7    | 2         | 6         | 6     | 1          | 5          | 9688.804           | 0.008                                 |

| $J'$ | $K'_{-1}$ | $K'_{+1}$ | $J''$ | $K''_{-1}$ | $K''_{+1}$ | $v_{\text{obs}}$ | $v_{\text{obs}} - v_{\text{cal}}$ |
|------|-----------|-----------|-------|------------|------------|------------------|-----------------------------------|
| 6    | 2         | 4         | 5     | 1          | 5          | 9845.451         | 0.012                             |
| 8    | 2         | 7         | 7     | 1          | 6          | 10153.888        | 0.024                             |
| 3    | 3         | 1         | 2     | 2          | 0          | 11612.819        | 0.008                             |
| 3    | 3         | 0         | 2     | 2          | 1          | 11613.431        | 0.005                             |
| 4    | 3         | 2         | 3     | 2          | 1          | 12215.420        | -0.004                            |
| 4    | 3         | 1         | 3     | 2          | 2          | 12218.517        | 0.005                             |
| 5    | 3         | 2         | 4     | 2          | 3          | 12824.992        | 0.000                             |
| 6    | 3         | 4         | 5     | 2          | 3          | 13411.946        | 0.004                             |
| 6    | 3         | 3         | 5     | 2          | 4          | 13433.713        | 0.000                             |

**Table S2.** Measured rotational transitions and residuals (in MHz) of rotamer II.

| $J'$ | $K'_{-1}$ | $K'_{+1}$ | $J''$ | $K''_{-1}$ | $K''_{+1}$ | $\nu_{\text{obs}}$ | $\nu_{\text{obs}} - \nu_{\text{cal}}$ |
|------|-----------|-----------|-------|------------|------------|--------------------|---------------------------------------|
| 5    | 0         | 5         | 4     | 0          | 4          | 3012.195           | -0.021                                |
| 7    | 1         | 7         | 6     | 1          | 6          | 4086.434           | 0.013                                 |
| 7    | 0         | 7         | 6     | 0          | 6          | 4200.362           | 0.010                                 |
| 7    | 1         | 6         | 6     | 1          | 5          | 4365.874           | -0.003                                |
| 8    | 1         | 8         | 7     | 1          | 7          | 4667.451           | 0.011                                 |
| 8    | 0         | 8         | 7     | 0          | 7          | 4788.789           | 0.001                                 |
| 8    | 2         | 7         | 7     | 2          | 6          | 4831.605           | 0.007                                 |
| 8    | 1         | 7         | 7     | 1          | 6          | 4986.196           | 0.007                                 |
| 9    | 1         | 9         | 8     | 1          | 8          | 5247.471           | 0.002                                 |
| 9    | 2         | 7         | 8     | 2          | 6          | 5503.807           | -0.011                                |
| 9    | 1         | 8         | 8     | 1          | 7          | 5605.014           | -0.010                                |
| 10   | 1         | 10        | 9     | 1          | 9          | 5826.421           | -0.028                                |
| 10   | 0         | 10        | 9     | 0          | 9          | 5953.083           | 0.002                                 |
| 10   | 2         | 9         | 9     | 2          | 8          | 6033.408           | 0.011                                 |
| 10   | 2         | 8         | 9     | 2          | 7          | 6129.094           | 0.009                                 |
| 10   | 1         | 9         | 9     | 1          | 8          | 6222.120           | -0.002                                |

**Table S3.** Measured rotational transitions and residuals (in MHz) of rotamer III.

| $J'$ | $K'_{-1}$ | $K'_{+1}$ | $J''$ | $K''_{-1}$ | $K''_{+1}$ | $\nu_{\text{obs}}$ | $\nu_{\text{obs}} - \nu_{\text{cal}}$ |
|------|-----------|-----------|-------|------------|------------|--------------------|---------------------------------------|
| 5    | 1         | 5         | 4     | 1          | 4          | 2931.355           | -0.009                                |
| 5    | 0         | 5         | 4     | 0          | 4          | 3022.140           | 0.018                                 |
| 6    | 1         | 6         | 5     | 1          | 5          | 3516.024           | -0.013                                |
| 6    | 0         | 6         | 5     | 0          | 5          | 3619.870           | -0.023                                |
| 6    | 1         | 5         | 5     | 1          | 4          | 3756.577           | -0.031                                |
| 7    | 1         | 7         | 6     | 1          | 6          | 4099.929           | 0.041                                 |
| 8    | 1         | 8         | 7     | 1          | 7          | 4682.827           | 0.005                                 |
| 8    | 0         | 8         | 7     | 0          | 7          | 4804.550           | 0.005                                 |
| 8    | 1         | 7         | 7     | 1          | 6          | 5002.565           | 0.018                                 |
| 9    | 0         | 9         | 8     | 0          | 8          | 5390.749           | 0.001                                 |
| 9    | 1         | 8         | 8     | 1          | 7          | 5623.425           | 0.011                                 |
| 10   | 1         | 10        | 9     | 1          | 9          | 5845.638           | -0.015                                |
| 10   | 0         | 10        | 9     | 0          | 9          | 5972.679           | -0.002                                |
| 10   | 2         | 9         | 9     | 2          | 8          | 6053.224           | -0.010                                |

**Table S4.** Measured rotational transitions and residuals (in MHz) of rotamer IV.

| $J'$ | $K'_{-1}$ | $K'_{+1}$ | $J''$ | $K''_{-1}$ | $K''_{+1}$ | $\nu_{\text{obs}}$ | $\nu_{\text{obs}} - \nu_{\text{cal}}$ |
|------|-----------|-----------|-------|------------|------------|--------------------|---------------------------------------|
| 5    | 1         | 5         | 4     | 0          | 4          | 4711.237           | -0.010                                |
| 6    | 1         | 6         | 5     | 0          | 5          | 5205.826           | -0.021                                |
| 9    | 2         | 8         | 8     | 2          | 7          | 5458.911           | -0.017                                |
| 2    | 2         | 0         | 2     | 1          | 1          | 5847.515           | -0.011                                |
| 10   | 1         | 10        | 9     | 1          | 9          | 5854.232           | 0.003                                 |
| 2    | 2         | 1         | 2     | 1          | 2          | 5967.589           | -0.015                                |
| 10   | 0         | 10        | 9     | 0          | 9          | 5981.419           | -0.006                                |
| 3    | 2         | 2         | 3     | 1          | 3          | 6028.315           | -0.019                                |
| 10   | 5         | 5         | 9     | 5          | 4          | 6083.089           | -0.009                                |
| 10   | 3         | 7         | 9     | 3          | 6          | 6094.050           | 0.014                                 |
| 4    | 2         | 3         | 4     | 1          | 4          | 6109.487           | -0.046                                |
| 10   | 1         | 9         | 9     | 1          | 8          | 6251.899           | -0.009                                |
| 2    | 2         | 1         | 1     | 1          | 0          | 7102.698           | -0.001                                |
| 2    | 2         | 0         | 1     | 1          | 1          | 7143.541           | -0.006                                |
| 3    | 2         | 2         | 2     | 1          | 1          | 7670.259           | 0.013                                 |
| 3    | 2         | 1         | 2     | 1          | 2          | 7794.023           | 0.001                                 |
| 4    | 2         | 3         | 3     | 1          | 2          | 8217.607           | 0.021                                 |
| 4    | 2         | 2         | 3     | 1          | 3          | 8468.209           | 0.002                                 |
| 5    | 2         | 4         | 4     | 1          | 3          | 8744.797           | 0.015                                 |
| 5    | 2         | 3         | 4     | 1          | 4          | 9168.572           | -0.008                                |
| 6    | 2         | 4         | 5     | 1          | 5          | 9898.238           | 0.023                                 |
| 7    | 2         | 5         | 6     | 1          | 6          | 10660.714          | 0.000                                 |
| 3    | 3         | 1         | 2     | 2          | 0          | 11668.531          | 0.000                                 |
| 4    | 3         | 2         | 3     | 2          | 1          | 12275.072          | 0.012                                 |
| 4    | 3         | 1         | 3     | 2          | 2          | 12278.185          | 0.002                                 |
| 5    | 3         | 3         | 4     | 2          | 2          | 12879.212          | -0.008                                |
| 5    | 3         | 2         | 4     | 2          | 3          | 12888.638          | 0.016                                 |

**Table S5.** Measured rotational transitions and residuals (in MHz) of rotamer V.

| $J'$ | $K'_{-1}$ | $K'_{+1}$ | $J''$ | $K''_{-1}$ | $K''_{+1}$ | $\nu_{\text{obs}}$ | $\nu_{\text{obs}} - \nu_{\text{cal}}$ |
|------|-----------|-----------|-------|------------|------------|--------------------|---------------------------------------|
| 4    | 1         | 4         | 3     | 1          | 3          | 2271.550           | 0.035                                 |
| 4    | 0         | 4         | 3     | 0          | 3          | 2336.888           | 0.029                                 |
| 4    | 1         | 3         | 3     | 1          | 2          | 2408.660           | -0.005                                |
| 5    | 1         | 5         | 4     | 1          | 4          | 2838.663           | 0.008                                 |
| 6    | 0         | 6         | 5     | 0          | 5          | 3497.260           | 0.002                                 |
| 6    | 1         | 5         | 5     | 1          | 4          | 3610.897           | -0.007                                |
| 7    | 0         | 7         | 6     | 0          | 6          | 4074.112           | -0.001                                |
| 7    | 2         | 5         | 6     | 2          | 4          | 4115.885           | -0.001                                |
| 8    | 1         | 8         | 7     | 1          | 7          | 4536.898           | -0.014                                |
| 8    | 0         | 8         | 7     | 0          | 7          | 4648.296           | 0.000                                 |
| 8    | 1         | 7         | 7     | 1          | 6          | 4810.503           | 0.005                                 |
| 9    | 0         | 9         | 8     | 0          | 8          | 5219.552           | 0.004                                 |
| 9    | 1         | 8         | 8     | 1          | 7          | 5408.956           | -0.006                                |
| 10   | 1         | 10        | 9     | 1          | 9          | 5665.749           | -0.014                                |



**Table S6.** Measured rotational transitions and residuals (in MHz) of rotamer VI..

| $J'$ | $K'_{-1}$ | $K'_{+1}$ | $J''$ | $K''_{-1}$ | $K''_{+1}$ | $\nu_{\text{obs}}$ | $\nu_{\text{obs}} - \nu_{\text{cal}}$ |
|------|-----------|-----------|-------|------------|------------|--------------------|---------------------------------------|
| 5    | 1         | 4         | 4     | 1          | 3          | 3012.649           | -0.010                                |
| 2    | 1         | 2         | 1     | 0          | 1          | 3301.486           | -0.003                                |
| 7    | 0         | 7         | 6     | 0          | 6          | 4077.656           | 0.000                                 |
| 7    | 1         | 6         | 6     | 1          | 5          | 4214.761           | 0.017                                 |
| 4    | 1         | 4         | 3     | 0          | 3          | 4353.796           | -0.029                                |
| 8    | 1         | 8         | 7     | 1          | 7          | 4540.888           | 0.000                                 |
| 8    | 0         | 8         | 7     | 0          | 7          | 4652.326           | -0.009                                |
| 8    | 2         | 7         | 7     | 2          | 6          | 4680.928           | -0.003                                |
| 8    | 2         | 6         | 7     | 2          | 5          | 4714.462           | -0.005                                |
| 5    | 1         | 5         | 4     | 0          | 4          | 4856.054           | -0.021                                |
| 9    | 1         | 9         | 8     | 1          | 8          | 5106.180           | 0.003                                 |
| 9    | 0         | 9         | 8     | 0          | 8          | 5224.071           | -0.009                                |
| 6    | 1         | 6         | 5     | 0          | 5          | 5343.785           | -0.002                                |
| 10   | 1         | 10        | 9     | 1          | 9          | 5670.721           | -0.006                                |
| 7    | 1         | 7         | 6     | 0          | 6          | 5818.437           | 0.041                                 |
| 8    | 1         | 8         | 7     | 0          | 7          | 6281.615           | -0.014                                |
| 3    | 2         | 2         | 3     | 1          | 3          | 6647.676           | -0.002                                |
| 4    | 2         | 3         | 4     | 1          | 4          | 6716.768           | -0.027                                |
| 5    | 2         | 4         | 5     | 1          | 5          | 6803.415           | -0.010                                |
| 7    | 2         | 6         | 7     | 1          | 7          | 7029.784           | -0.006                                |
| 2    | 2         | 1         | 1     | 1          | 0          | 7698.804           | 0.013                                 |
| 2    | 2         | 0         | 1     | 1          | 1          | 7733.516           | 0.005                                 |
| 3    | 2         | 2         | 2     | 1          | 1          | 8250.220           | 0.010                                 |
| 3    | 2         | 1         | 2     | 1          | 2          | 8355.193           | 0.012                                 |
| 4    | 2         | 3         | 3     | 1          | 2          | 8784.421           | 0.010                                 |
| 4    | 2         | 2         | 3     | 1          | 3          | 8996.366           | -0.004                                |
| 5    | 2         | 4         | 4     | 1          | 3          | 9301.431           | -0.002                                |
| 5    | 2         | 3         | 4     | 1          | 4          | 9658.723           | 0.006                                 |
| 6    | 2         | 5         | 5     | 1          | 4          | 9801.364           | 0.004                                 |
| 7    | 2         | 6         | 6     | 1          | 5          | 10284.318          | -0.005                                |
| 6    | 2         | 4         | 5     | 1          | 5          | 10344.287          | 0.022                                 |
| 8    | 2         | 7         | 7     | 1          | 6          | 10750.517          | 0.006                                 |
| 7    | 2         | 5         | 6     | 1          | 6          | 11055.444          | 0.004                                 |
| 3    | 3         | 1         | 2     | 2          | 0          | 12664.505          | -0.012                                |
| 3    | 3         | 1         | 2     | 2          | 1          | 12664.937          | 0.015                                 |
| 4    | 3         | 1         | 3     | 2          | 1          | 13249.436          | -0.018                                |
| 4    | 3         | 2         | 3     | 2          | 2          | 13251.481          | 0.025                                 |
| 5    | 3         | 3         | 4     | 2          | 2          | 13832.768          | -0.030                                |
| 5    | 3         | 2         | 4     | 2          | 3          | 13838.955          | 0.004                                 |

**Table S7.** Measured rotational transitions and residuals (in MHz) of rotamer VII..

| $J'$ | $K'_{-1}$ | $K'_{+1}$ | $J''$ | $K''_{-1}$ | $K''_{+1}$ | $\nu_{\text{obs}}$ | $\nu_{\text{obs}} - \nu_{\text{cal}}$ |
|------|-----------|-----------|-------|------------|------------|--------------------|---------------------------------------|
| 5    | 1         | 4         | 4     | 1          | 3          | 3033.537           | -0.005                                |
| 2    | 1         | 2         | 1     | 0          | 1          | 3288.840           | 0.005                                 |
| 7    | 1         | 7         | 6     | 1          | 6          | 3999.145           | 0.024                                 |
| 8    | 1         | 7         | 7     | 1          | 6          | 4847.753           | -0.029                                |
| 5    | 1         | 5         | 4     | 0          | 4          | 4850.921           | 0.000                                 |
| 9    | 0         | 9         | 8     | 0          | 8          | 5256.347           | 0.000                                 |
| 6    | 1         | 6         | 5     | 0          | 5          | 5340.612           | -0.016                                |
| 10   | 1         | 10        | 9     | 1          | 9          | 5704.948           | -0.003                                |
| 10   | 1         | 9         | 9     | 1          | 8          | 6052.548           | -0.016                                |
| 6    | 2         | 4         | 6     | 1          | 5          | 6151.913           | -0.022                                |
| 5    | 2         | 3         | 5     | 1          | 4          | 6240.572           | -0.015                                |
| 2    | 2         | 1         | 1     | 1          | 0          | 7648.249           | 0.001                                 |
| 2    | 2         | 0         | 1     | 1          | 1          | 7683.684           | -0.005                                |
| 3    | 2         | 2         | 2     | 1          | 1          | 8202.819           | 0.007                                 |
| 3    | 2         | 1         | 2     | 1          | 2          | 8310.001           | 0.016                                 |
| 4    | 2         | 3         | 3     | 1          | 2          | 8739.817           | 0.012                                 |
| 5    | 2         | 4         | 4     | 1          | 3          | 9259.283           | 0.014                                 |
| 5    | 2         | 3         | 4     | 1          | 4          | 9624.287           | 0.023                                 |
| 6    | 2         | 5         | 5     | 1          | 4          | 9761.320           | 0.030                                 |
| 3    | 3         | 0         | 2     | 2          | 0          | 12579.548          | -0.028                                |
| 3    | 3         | 0         | 2     | 2          | 1          | 12580.009          | 0.008                                 |
| 4    | 3         | 2         | 3     | 2          | 1          | 13168.283          | -0.010                                |
| 4    | 3         | 1         | 3     | 2          | 2          | 13170.437          | -0.004                                |

**Table S8.** Measured rotational transitions and residuals (in MHz) of rotamer VIII.

| $J'$ | $K'_{-1}$ | $K'_{+1}$ | $J''$ | $K''_{-1}$ | $K''_{+1}$ | $\nu_{\text{obs}}$ | $\nu_{\text{obs}} - \nu_{\text{cal}}$ |
|------|-----------|-----------|-------|------------|------------|--------------------|---------------------------------------|
| 8    | 1         | 8         | 7     | 1          | 7          | 4573.206           | -0.019                                |
| 8    | 0         | 8         | 7     | 0          | 7          | 4686.285           | -0.012                                |
| 8    | 1         | 7         | 7     | 1          | 6          | 4852.838           | 0.002                                 |
| 9    | 1         | 8         | 8     | 1          | 7          | 5456.410           | -0.022                                |
| 10   | 1         | 10        | 9     | 1          | 9          | 5710.907           | 0.019                                 |
| 10   | 0         | 10        | 9     | 0          | 9          | 5834.071           | 0.002                                 |
| 10   | 1         | 9         | 9     | 1          | 8          | 6058.893           | 0.022                                 |

### 3-Cartesian coordinates

**Table S9.** Cartesian coordinates of conformer *syn-cis-a* optimized at B3LYP-GD3BJ/6-

| Center<br>Number | Atomic<br>Number | X        | Y        | Z        |
|------------------|------------------|----------|----------|----------|
| 1                | 6                | -0.10397 | -0.48070 | 0.00018  |
| 2                | 6                | -0.88624 | -1.64440 | -0.00009 |
| 3                | 6                | -2.27513 | -1.58282 | -0.00034 |
| 4                | 6                | -2.91362 | -0.34981 | -0.00023 |
| 5                | 6                | -2.14074 | 0.82612  | 0.00022  |
| 6                | 6                | -0.76239 | 0.76441  | 0.00038  |
| 7                | 1                | -0.39535 | -2.61030 | -0.00013 |
| 8                | 1                | -2.87926 | -2.48118 | -0.00061 |
| 9                | 1                | -0.19100 | 1.68633  | 0.00085  |
| 10               | 8                | -2.87145 | 1.99096  | 0.00019  |
| 11               | 1                | -2.29081 | 2.75822  | 0.00163  |
| 12               | 8                | -4.26795 | -0.28278 | -0.00024 |
| 13               | 1                | -4.52986 | 0.64769  | -0.00067 |
| 14               | 6                | 1.34427  | -0.60539 | 0.00016  |
| 15               | 6                | 2.25530  | 0.38333  | -0.00014 |
| 16               | 1                | 1.99088  | 1.43299  | -0.00052 |
| 17               | 1                | 1.73193  | -1.62084 | 0.00041  |
| 18               | 6                | 3.68838  | 0.06774  | -0.00005 |
| 19               | 8                | 4.44489  | 1.20194  | -0.00086 |
| 20               | 1                | 5.37064  | 0.91812  | -0.00064 |
| 21               | 8                | 4.18921  | -1.03536 | 0.00080  |

311++G(d,p).

**Table S10.** Cartesian coordinates of conformer *syn-cis-a* optimized at B3LYP-

| Center Number | Atomic Number | X        | Y        | Z        |
|---------------|---------------|----------|----------|----------|
| 1             | 6             | -0.10198 | -0.46882 | 0.00000  |
| 2             | 6             | -0.88182 | -1.63360 | 0.00041  |
| 3             | 6             | -2.27182 | -1.56181 | 0.00061  |
| 4             | 6             | -2.89625 | -0.32327 | 0.00035  |
| 5             | 6             | -2.13185 | 0.85678  | -0.00010 |
| 6             | 6             | -0.75175 | 0.77826  | -0.00036 |
| 7             | 1             | -0.39587 | -2.60166 | 0.00070  |
| 8             | 1             | -2.86869 | -2.46817 | 0.00123  |
| 9             | 1             | -0.19233 | 1.70460  | -0.00092 |
| 10            | 8             | -2.74240 | 2.07295  | -0.00013 |
| 11            | 1             | -3.69882 | 1.93793  | -0.00350 |
| 12            | 8             | -4.25494 | -0.13477 | 0.00080  |
| 13            | 1             | -4.71654 | -0.97918 | -0.00737 |
| 14            | 6             | 1.34827  | -0.60078 | -0.00018 |
| 15            | 6             | 2.26045  | 0.38530  | 0.00056  |
| 16            | 1             | 1.99735  | 1.43508  | 0.00154  |
| 17            | 1             | 1.73279  | -1.61745 | -0.00114 |
| 18            | 6             | 3.69340  | 0.06335  | -0.00005 |
| 19            | 8             | 4.45434  | 1.19315  | 0.00065  |
| 20            | 1             | 5.37904  | 0.90590  | 0.00023  |
| 21            | 8             | 4.18841  | -1.04252 | -0.00109 |

GD3BJ/6-311++G(d,p).

| Center Number | Atomic Number | X        | Y        | Z        |
|---------------|---------------|----------|----------|----------|
| 1             | 6             | 0.08724  | -0.44939 | 0.00002  |
| 2             | 6             | 0.84560  | -1.62865 | 0.00000  |
| 3             | 6             | 2.23549  | -1.59568 | -0.00003 |
| 4             | 6             | 2.89917  | -0.37603 | -0.00002 |
| 5             | 6             | 2.15034  | 0.81529  | 0.00002  |
| 6             | 6             | 0.77093  | 0.78178  | 0.00003  |
| 7             | 1             | 0.33550  | -2.58466 | 0.00000  |
| 8             | 1             | 2.82130  | -2.50610 | -0.00005 |
| 9             | 1             | 0.21936  | 1.71557  | 0.00003  |
| 10            | 8             | 2.90439  | 1.96481  | 0.00002  |
| 11            | 1             | 2.33974  | 2.74399  | 0.00011  |
| 12            | 8             | 4.25452  | -0.33676 | -0.00002 |
| 13            | 1             | 4.53557  | 0.58815  | -0.00005 |
| 14            | 6             | -1.36485 | -0.54474 | 0.00003  |
| 15            | 6             | -2.24748 | 0.47050  | -0.00008 |
| 16            | 1             | -1.94478 | 1.50991  | -0.00021 |
| 17            | 1             | -1.76357 | -1.55432 | 0.00014  |
| 18            | 6             | -3.70049 | 0.29013  | -0.00003 |
| 19            | 8             | -4.09827 | -1.01381 | 0.00003  |
| 20            | 1             | -5.06580 | -1.00357 | 0.00012  |
| 21            | 8             | -4.50227 | 1.19974  | -0.00001 |

**Table S11.** Cartesian coordinates of conformer *syn-trans-a* optimized at B3LYP-GD3BJ/6-311++G(d,p).

| Center Number | Atomic Number | X        | Y        | Z        |
|---------------|---------------|----------|----------|----------|
| 1             | 6             | 0.08545  | -0.43652 | 0.00030  |
| 2             | 6             | 0.84103  | -1.61706 | 0.00016  |
| 3             | 6             | 2.23230  | -1.57443 | 0.00010  |
| 4             | 6             | 2.88239  | -0.34922 | 0.00005  |
| 5             | 6             | 2.14242  | 0.84626  | 0.00021  |
| 6             | 6             | 0.76086  | 0.79658  | 0.00026  |
| 7             | 1             | 0.33565  | -2.57522 | 0.00026  |
| 8             | 1             | 2.81009  | -2.49306 | 0.00029  |
| 9             | 1             | 0.22165  | 1.73477  | 0.00035  |
| 10            | 8             | 2.77759  | 2.04943  | 0.00049  |
| 11            | 1             | 3.73109  | 1.89522  | -0.00282 |
| 12            | 8             | 4.24467  | -0.18881 | 0.00015  |
| 13            | 1             | 4.68893  | -1.04245 | -0.00708 |
| 14            | 6             | -1.36879 | -0.53906 | 0.00019  |
| 15            | 6             | -2.25306 | 0.47329  | 0.00028  |
| 16            | 1             | -1.95225 | 1.51306  | 0.00044  |
| 17            | 1             | -1.76401 | -1.55001 | -0.00013 |
| 18            | 6             | -3.70625 | 0.28493  | -0.00018 |
| 19            | 8             | -4.09714 | -1.02169 | 0.00023  |
| 20            | 1             | -5.06470 | -1.01588 | -0.00036 |
| 21            | 8             | -4.51319 | 1.18919  | -0.00076 |

**Table S12.** Cartesian coordinates of conformer *syn-trans-b* optimized at B3LYP-GD3BJ/6-311++G(d,p).

| Center Number | Atomic Number | X        | Y        | Z        |
|---------------|---------------|----------|----------|----------|
| 1             | 6             | 0.08781  | 0.02137  | 0.00014  |
| 2             | 6             | 0.53886  | -1.30837 | 0.00018  |
| 3             | 6             | 1.89376  | -1.60264 | 0.00005  |
| 4             | 6             | 2.83613  | -0.57676 | -0.00006 |
| 5             | 6             | 2.40049  | 0.75537  | 0.00008  |
| 6             | 6             | 1.04849  | 1.04888  | 0.00011  |
| 7             | 1             | -0.17452 | -2.12210 | 0.00029  |
| 8             | 1             | 2.24633  | -2.62642 | 0.00000  |
| 9             | 1             | 0.72305  | 2.08483  | 0.00025  |
| 10            | 8             | 3.40544  | 1.69473  | 0.00010  |
| 11            | 1             | 3.04018  | 2.58482  | -0.00150 |
| 12            | 8             | 4.15989  | -0.87364 | -0.00016 |
| 13            | 1             | 4.66032  | -0.04667 | -0.00078 |
| 14            | 6             | -1.31946 | 0.38935  | 0.00010  |
| 15            | 6             | -2.38346 | -0.43179 | 0.00018  |
| 16            | 1             | -2.29916 | -1.51066 | 0.00028  |
| 17            | 1             | -1.53524 | 1.45503  | -0.00015 |
| 18            | 6             | -3.74142 | 0.12548  | -0.00006 |
| 19            | 8             | -4.68156 | -0.86042 | -0.00030 |
| 20            | 1             | -5.54478 | -0.42178 | -0.00034 |
| 21            | 8             | -4.04419 | 1.29903  | 0.00007  |

**Table S13.** Cartesian coordinates of conformer *anti-cis-b* optimized at B3LYP-GD3BJ/6-311++G(d,p).



| Center Number | Atomic Number | X        | Y        | Z        |
|---------------|---------------|----------|----------|----------|
| 1             | 6             | 0.08746  | 0.03748  | -0.00010 |
| 2             | 6             | 0.53533  | -1.29292 | -0.00014 |
| 3             | 6             | 1.89366  | -1.57866 | -0.00008 |
| 4             | 6             | 2.82504  | -0.54492 | 0.00001  |
| 5             | 6             | 2.39881  | 0.78929  | 0.00002  |
| 6             | 6             | 1.04100  | 1.06860  | -0.00003 |
| 7             | 1             | -0.17404 | -2.10972 | -0.00025 |
| 8             | 1             | 2.23586  | -2.60877 | -0.00011 |
| 9             | 1             | 0.72881  | 2.10605  | -0.00001 |
| 10            | 8             | 3.30061  | 1.80844  | 0.00006  |
| 11            | 1             | 4.19034  | 1.43254  | 0.00020  |
| 12            | 8             | 4.18537  | -0.72586 | 0.00008  |
| 13            | 1             | 4.40480  | -1.66279 | 0.00006  |
| 14            | 6             | -1.32382 | 0.40070  | -0.00012 |
| 15            | 6             | -2.38146 | -0.42741 | 0.00020  |
| 16            | 1             | -2.28919 | -1.50572 | 0.00054  |
| 17            | 1             | -1.54223 | 1.46549  | -0.00040 |
| 18            | 6             | -3.74546 | 0.11698  | 0.00005  |
| 19            | 8             | -4.67506 | -0.87944 | 0.00006  |
| 20            | 1             | -5.54287 | -0.44988 | -0.00001 |
| 21            | 8             | -4.06027 | 1.28660  | -0.00006 |

**Table S14.** Cartesian coordinates of conformer *anti-cis-a* optimized at B3LYP-GD3BJ/6-311++G(d,p).

| Center Number | Atomic Number | X        | Y        | Z        |
|---------------|---------------|----------|----------|----------|
| 1             | 6             | 0.07490  | -0.00853 | 0.00005  |
| 2             | 6             | 0.54999  | -1.32971 | 0.00010  |
| 3             | 6             | 1.91006  | -1.59936 | 0.00008  |
| 4             | 6             | 2.83403  | -0.55699 | 0.00000  |
| 5             | 6             | 2.37428  | 0.76697  | -0.00002 |
| 6             | 6             | 1.01708  | 1.03587  | 0.00001  |
| 7             | 1             | -0.14775 | -2.15676 | 0.00017  |
| 8             | 1             | 2.28078  | -2.61670 | 0.00011  |
| 9             | 1             | 0.67385  | 2.06616  | -0.00001 |
| 10            | 8             | 3.36202  | 1.72453  | -0.00006 |
| 11            | 1             | 2.98077  | 2.60785  | -0.00019 |
| 12            | 8             | 4.16282  | -0.83011 | -0.00005 |
| 13            | 1             | 4.64862  | 0.00551  | -0.00004 |
| 14            | 6             | -1.34036 | 0.33472  | 0.00006  |
| 15            | 6             | -2.38289 | -0.51492 | -0.00010 |
| 16            | 1             | -2.26142 | -1.59040 | -0.00026 |
| 17            | 1             | -1.56515 | 1.39698  | 0.00018  |
| 18            | 6             | -3.78271 | -0.08451 | -0.00005 |
| 19            | 8             | -3.94795 | 1.26990  | 0.00011  |
| 20            | 1             | -4.90275 | 1.42664  | 0.00012  |
| 21            | 8             | -4.73104 | -0.83937 | -0.00012 |

**Table S15.** Cartesian coordinates of conformer *anti-trans-b* optimized at B3LYP-GD3BJ/6-311++G(d,p).

| Center Number | Atomic Number | X        | Y        | Z        |
|---------------|---------------|----------|----------|----------|
| 1             | 6             | 0.07438  | 0.00580  | 0.00012  |
| 2             | 6             | 0.54718  | -1.31569 | 0.00020  |
| 3             | 6             | 1.91076  | -1.57567 | 0.00014  |
| 4             | 6             | 2.82272  | -0.52493 | 0.00001  |
| 5             | 6             | 2.37133  | 0.80095  | -0.00006 |
| 6             | 6             | 1.00852  | 1.05445  | 0.00001  |
| 7             | 1             | -0.14593 | -2.14624 | 0.00034  |
| 8             | 1             | 2.27191  | -2.59928 | 0.00024  |
| 9             | 1             | 0.67754  | 2.08613  | -0.00003 |
| 10            | 8             | 3.25366  | 1.83720  | -0.00022 |
| 11            | 1             | 4.15032  | 1.47810  | -0.00022 |
| 12            | 8             | 4.18620  | -0.68006 | -0.00002 |
| 13            | 1             | 4.42342  | -1.61266 | -0.00006 |
| 14            | 6             | -1.34476 | 0.34365  | 0.00013  |
| 15            | 6             | -2.38108 | -0.51232 | -0.00018 |
| 16            | 1             | -2.25288 | -1.58711 | -0.00052 |
| 17            | 1             | -1.57247 | 1.40498  | 0.00042  |
| 18            | 6             | -3.78517 | -0.09302 | -0.00010 |
| 19            | 8             | -3.96108 | 1.25856  | 0.00029  |
| 20            | 1             | -4.91685 | 1.40937  | 0.00041  |
| 21            | 8             | -4.72608 | -0.85728 | -0.00032 |

**Table S16.** Cartesian coordinates of conformer *anti-trans-a* optimized at B3LYP-GD3BJ/6-311++G(d,p).
